# Supplementary material for: A programmable and reconfigurable microfluidic chip
Source: Royal Society of Chemistry journal article supplement (doi:10.1039/c3lc50850a), 2013-01-01
Supplement: c3lc50850a.pdf [file c3lc50850a.pdf]

## Programmable and reconfigurable microfluidic chip

Raphael Renaudot<sup>a</sup>, Vincent Agache<sup>\*a</sup>, Yves Fouillet<sup>a</sup>, Guillaume Laffite<sup>a</sup>, Emilie Bisceglia<sup>a</sup>, Laurent Jalabert<sup>b</sup>, Momoko Kumemura<sup>b,c</sup>, Dominique Collard<sup>b</sup>, Hiroyuki Fujita<sup>c</sup>

<sup>a</sup> CEA-Leti, Minatec Campus, Grenoble, 38054, France. E-mail: raphael.renaudot@cea.fr; vincent.agache@cea.fr; yves.fouillet@cea.fr; guillaume.laffite@cea.fr; emilie.bisceglia@cea.fr.

<sup>b</sup> LIMMS/CNRS- IIS, The University of Tokyo, 153-8505 Tokyo, Japan. E-mail: momo@iis.u-tokyo.ac.jp; jalabert@iis.u-tokyo.ac.jp; collard@iis.u-tokyo.ac.jp

<sup>c</sup> Institute of Industrial Science, The University of Tokyo, 153-8505 Tokyo, Japan. E-mail: fujita@iis.u-tokyo.ac.jp

### Supplementary materials

#### A. Two supplementary channels geometry fabrication examples

First example is illustrated in Fig. S1A. The chip geometry is symmetrical, and consists of two pairs of inlet/outlet reservoirs, communicating through two bypass channels, which are joining together in two areas and disrupted by a paraffin pillar. The channels geometry is build from a DMF platform, made of an array of 83 electrodes. The channel width is 800  $\mu\text{m}$  while the channel height is 110  $\mu\text{m}$ .

In Fig. S1B, the investigated design, firstly described in Tan et al. corresponds to a microfluidic system which aimed at trapping and releasing of microbeads or particles.<sup>46</sup> The DI water liquid finger shape in liquid paraffin is created in two steps: first the DI water is actuated onto the serpentine shape electrode and second the DI water is pulled onto the triangular restriction shape electrodes. The serpentine channel width is 200  $\mu\text{m}$  and the channel height is 110  $\mu\text{m}$ .

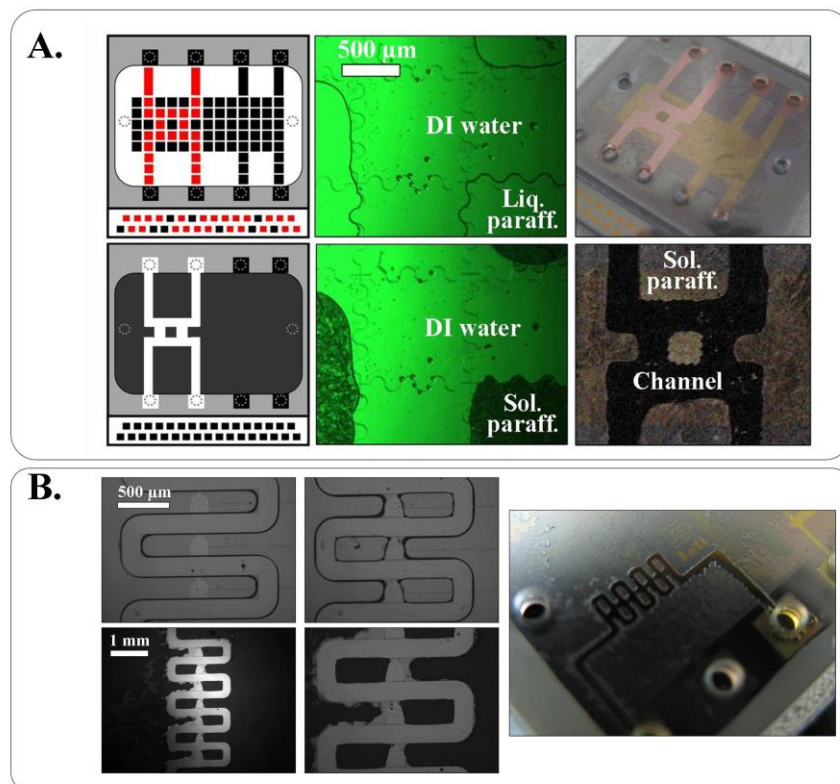

**Fig S1:** Photographs illustrating two supplementary CMF chips fabricated within this study. **A.** A bypass geometry. **B.** A microfluidic channel geometry used to trap particles.<sup>46</sup>

### **B. Two supplementary CMF experiments examples.**

In Fig. S2, the chip, shown in Fig 3B, made of an array of paraffin micropillars is used to carry out a very simple and basic biological protocol for bacteria trapping. First, DI water solution is injected in the chip, followed by a PEI (PolyEthyleneImine) polymer solute diluted in DI water. The PEI polymer ( $C_2H_5N$ )<sub>n</sub> used in this study (supplied by Sigma Aldrich AZ234) is soluble in DI water solution at  $40\text{ mg}\cdot\text{mL}^{-1}$  weight concentration. This polymer is used as a probe layer to capture BSS bacteria.<sup>47</sup> At that stage of the protocol, the paraffin pillars walls are coated with the PEI polymer. Then a BSS (Bacillus Subtilis) spores solution and DI water are successively inserted. Finally, optical pictures show the trapping of BSS spores onto the paraffin pillars walls.

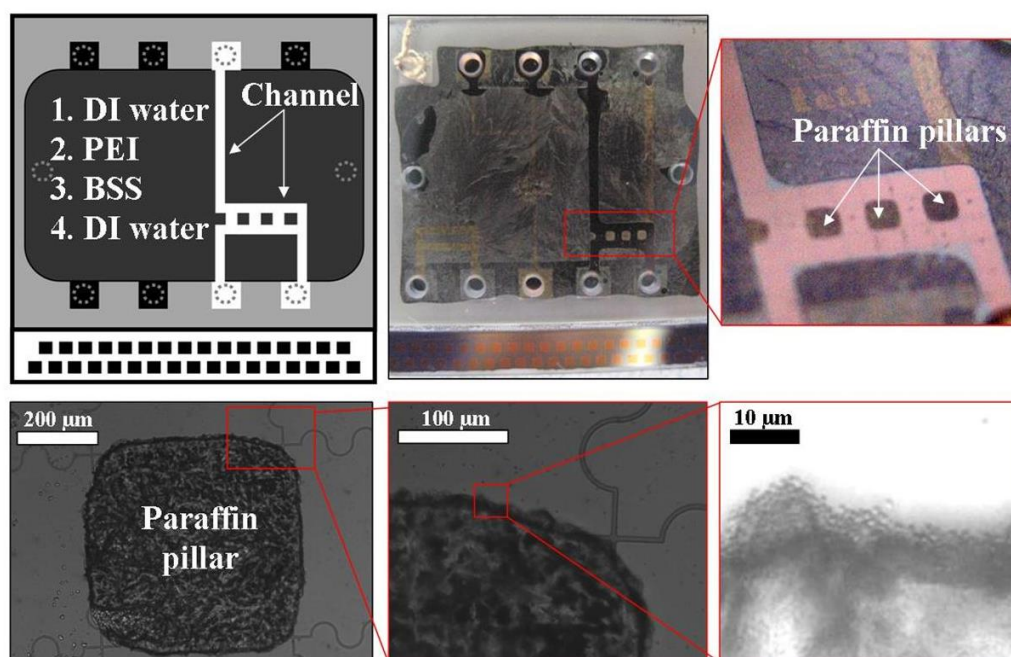

**Fig S2.** Bacteria trapping onto paraffin pillars walls after a biological based PEI deposition protocol.

### C. References

- 46 W. H. Tan and S. Takeushi, *Proc. Natl. Acad. Sci. U.S.A.*, 2007, **104**(4), 1146–1151.
- 47 R. Renaudot, T. Nguyen, Y. Fouillet, D. Jary, M. Kumemura, L. Jalabert, D. Collard, H. Fujita and V. Agache, *RSC Adv.*, 2013, **3**, 9214–9218.
